# Supplementary material
Source: HighWire-hosted journal article supplement (https://erj.ersjournals.com/content/58/4/2004518)

Supplementary figure 2

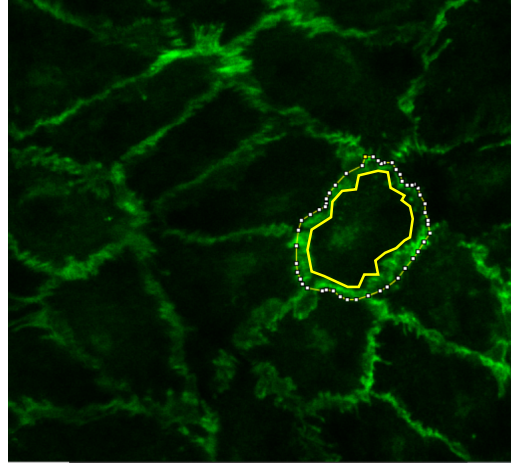

Supplement: inline-supplementary-material-4 [file inline-supplementary-material-4.pdf]
